# Supplementary material for: Efferocytosis potentiates the expression of arachidonate 15-lipoxygenase (ALOX15) in alternatively activated human macrophages through LXR activation
Source: Cell Death Differ. 2020 Nov 11;28(4):1301–16. doi: 10.1038/s41418-020-00652-4 (PMC8027700; doi:10.1038/s41418-020-00652-4)
Supplement: Supplementary file 5 — Supplementary Table 1 [file 41418_2020_652_MOESM5_ESM.xlsx]

## Sheet: IL-13
Gene	Tx	logFC	logCPM	F	PValue	FDR	log2CPM untx D1	log2CPM untx D2	log2CPM untx D3	log2CPM tx D1	log2CPM tx D2	log2CPM tx D3
ALOX15	IL-13	5.39471	2.1426	37.0623	0.000364637	0.895782	-3.08118	-0.818985	-2.06896	3.29115	3.58779	1.85893
TSPAN7	IL-13	3.35674	2.82879	16.0252	0.00439671	0.999782	0.077888	-0.969294	1.33432	4.51684	1.69952	3.62873
CTNNAL1	IL-13	2.91144	3.86969	40.2017	0.000275591	0.895782	0.994784	2.39999	1.69715	5.0945	4.81575	3.85428
PARM1	IL-13	2.84367	1.85478	19.7883	0.00241023	0.999782	-1.76657	0.493766	0.262667	2.31677	3.16272	2.26217
CISH	IL-13	2.842	3.85095	36.8489	0.000367305	0.895782	2.11638	1.54716	1.84924	5.47279	3.89205	4.02221
SPINT2	IL-13	2.74853	5.00403	15.5067	0.00480156	0.999782	2.71417	3.69617	2.48179	6.73854	5.49508	3.87864
TMEM130	IL-13	2.74263	2.21276	13.0051	0.00758323	0.999782	0.077888	1.20506	-1.06289	3.55269	3.25834	1.33297
MAOA	IL-13	2.70678	3.70512	17.9367	0.00323149	0.999782	1.68841	1.54716	2.17133	5.54529	3.35669	3.38697
SCIMP	IL-13	2.67313	5.24935	19.2505	0.00265142	0.999782	2.92916	4.2236	2.24632	6.69378	5.9508	4.94381
SLAMF1	IL-13	2.44581	1.65687	21.4786	0.00188136	0.999782	0.077888	-0.558494	0.526104	2.89584	1.29287	2.54689
CD209	IL-13	2.11021	3.59729	13.4845	0.00691637	0.999782	1.92935	2.82226	1.55688	4.86162	4.50082	2.74538
XKR3	IL-13	1.80178	0.107033	11.5444	0.0100184	0.999782	-0.769019	-0.443996	-1.7446	0.962966	0.492508	0.558363
HSPG2	IL-13	1.7683	1.843	13.3087	0.00701432	0.999782	0.662396	0.848567	0.748784	3.23088	2.03811	1.53037
MRC1	IL-13	1.73554	7.45207	21.5399	0.00192222	0.999782	6.41044	6.65602	5.82422	8.61718	8.03261	7.22436
PLXNA2	IL-13	1.70041	3.76746	26.2528	0.00103279	0.999782	2.15485	2.83366	2.96515	4.88136	3.99002	4.0653
CD1C	IL-13	1.59991	2.62142	12.2591	0.00863581	0.999782	1.03658	2.14949	1.49672	2.95026	3.83115	2.45269
SLC15A2	IL-13	1.4023	0.515385	11.2235	0.0107305	0.999782	-0.00449402	-0.443996	-0.360124	0.962966	1.36338	0.617452
FGL2	IL-13	1.37676	4.85222	37.7122	0.000329559	0.895782	3.6749	4.28715	3.99825	5.45219	5.54903	5.07871
HOMER2	IL-13	1.35649	2.04408	20.2265	0.00223963	0.999782	1.15517	1.37067	1.18981	2.87348	2.51163	2.18614
FAR2	IL-13	1.33742	2.45978	18.8685	0.00273157	0.999782	1.36659	1.67935	1.89657	3.23964	2.44815	3.09636
NIPAL1	IL-13	1.20765	3.09292	11.5132	0.010085	0.999782	2.36631	2.07463	2.64313	4.18593	3.14281	3.07544
ALDH1A2	IL-13	1.10566	4.30194	13.3044	0.00702009	0.999782	3.64818	3.37597	3.88547	5.30125	4.26791	4.44146
TGM2	IL-13	1.1008	10.2477	15.2616	0.00489999	0.999782	9.67468	9.52841	9.57796	11.2351	10.3205	10.31
CTSC	IL-13	0.899748	6.37768	16.5406	0.00394141	0.999782	6.01384	5.91938	5.61552	7.13312	6.612	6.41385
CHCHD7	IL-13	0.872286	5.49175	24.9921	0.00119922	0.999782	5.13546	5.0039	4.81957	6.09683	5.74829	5.69065
MYCL	IL-13	0.85343	4.30156	10.5359	0.0124859	0.999782
TRAF1	IL-13	0.844183	5.13261	11.0402	0.0111661	0.999782
WFS1	IL-13	0.839243	5.01192	16.001	0.00431392	0.999782
CYP27B1	IL-13	0.839132	5.87719	14.937	0.00518894	0.999782
ERI1	IL-13	0.822216	4.58444	10.6873	0.0120698	0.999782
PFKP	IL-13	0.812573	5.49714	10.6301	0.0122248	0.999782
EPB41L2	IL-13	0.667221	7.86346	17.5541	0.00334519	0.999782
