# Supplementary material for: Efferocytosis potentiates the expression of arachidonate 15-lipoxygenase (ALOX15) in alternatively activated human macrophages through LXR activation
Source: Cell Death Differ. 2020 Nov 11;28(4):1301–16. doi: 10.1038/s41418-020-00652-4 (PMC8027700; doi:10.1038/s41418-020-00652-4)
Supplement: Supplementary file 6 — Supplementary Table 2 [file 41418_2020_652_MOESM6_ESM.xlsx]

## Sheet: IL-4
Gene	Tx	logFC	logCPM	F	PValue	FDR	log2CPM untx D1	log2CPM untx D2	log2CPM untx D3	log2CPM tx D1	log2CPM tx D2	log2CPM tx D3
CRB2	IL-4	9.80365	1.81536	66.3564	0.000209853	0.0700989	-3.02118	-3.02118	-3.02118	2.80173	1.33469	3.52606
ALOX15	IL-4	6.79895	3.50603	75.1503	3.75246e-05	0.0299587	-3.02118	-0.809313	-2.04417	3.78176	5.19138	4.066
SIGLEC12	IL-4	6.47077	1.11427	123.236	4.10807e-06	0.00953517	-2.45804	-2.48106	-3.02118	2.00986	2.18655	2.02804
CCL13	IL-4	5.12089	1.57256	16.4081	0.00436657	0.301219	-1.261	-1.781	-3.02118	3.81022	0.299157	1.09381
FCER2	IL-4	5.06921	1.68504	32.1597	0.000503719	0.109829	-1.73877	-1.12411	-3.02118	2.97512	3.11663	1.00021
ENPP2	IL-4	4.67341	0.298472	30.3237	0.000584327	0.120926	-2.05404	-3.02118	-2.04417	0.821365	1.95439	0.25799
TSPAN7	IL-4	4.61208	3.98573	35.2719	0.000473901	0.107437	0.0898	-0.958143	1.32703	4.59486	3.56953	5.78211
SYT6	IL-4	4.45893	1.81788	20.6082	0.00215722	0.212908	-2.05404	-2.08898	-0.359858	2.68365	0.500767	3.62344
DACT1	IL-4	4.41321	1.57302	20.2059	0.00225291	0.212908	-2.05404	-0.674411	-2.04417	0.704947	3.59912	1.55525
GAS6	IL-4	4.35293	0.695699	40.514	0.000224165	0.0701809	-1.4802	-1.781	-3.02118	1.79887	1.62098	1.3429
CH25H	IL-4	4.30266	1.46841	23.6698	0.0013181	0.181257	-2.45804	-0.551052	-2.04417	1.25311	3.31692	1.65075
CTNNAL1	IL-4	4.01139	4.86911	116.278	5.46652e-06	0.00953517	1.00379	2.39757	1.68911	5.41709	5.83814	6.01081
AKAP5	IL-4	3.74522	2.78196	14.694	0.00582878	0.357635	-2.45804	-0.142003	1.06445	2.25728	3.02147	4.65896
MAOA	IL-4	3.7426	4.6289	180.92	9.59177e-07	0.00950652	1.69617	1.54592	2.16255	5.70921	5.01323	5.73386
SPINT2	IL-4	3.70418	5.86309	121.266	4.69392e-06	0.00953517	2.7209	3.69289	2.47265	6.90348	6.7828	6.54911
PARM1	IL-4	3.63598	2.54902	28.3466	0.000817655	0.153437	-1.73877	0.495357	0.259105	2.2778	3.9137	3.61557
SCIMP	IL-4	3.55331	6.03545	52.3677	0.000133776	0.0544468	2.93575	4.22013	2.23745	6.71223	6.94788	7.05596
CCL17	IL-4	3.48246	1.01798	18.0461	0.00289192	0.246925	-3.02118	-0.674411	-0.887172	1.44679	2.51625	1.30426
WNT5B	IL-4	3.4332	0.583713	24.8397	0.00109857	0.181257	-1.4802	-1.12411	-2.04417	2.29804	0.500767	0.84733
CD209	IL-4	3.3556	4.66846	102.925	8.38243e-06	0.0123485	1.93679	2.81947	1.54911	5.50458	5.62271	5.45394
CISH	IL-4	3.33408	4.2844	159.315	1.55717e-06	0.00950652	2.12363	1.54592	1.84093	5.05042	4.77148	5.5102
CD1B	IL-4	3.28676	4.12189	13.4425	0.00730973	0.39817	-0.752193	2.26953	2.18164	3.28999	5.9385	4.50986
APOL4	IL-4	3.21339	1.00987	36.9291	0.000306023	0.0812291	-1.73877	-0.674411	-0.887172	2.39516	1.26254	1.65075
MYORG	IL-4	3.21071	2.58742	26.0684	0.00102961	0.177063	0.502956	-0.437415	0.74319	3.42493	1.85975	4.1771
BMP6	IL-4	3.20109	0.285664	41.4259	0.00020788	0.0700989	-1.73877	-1.52734	-1.46695	0.76433	0.784533	1.58779
GASK1A	IL-4	3.19203	1.66402	63.3909	4.71515e-05	0.0319844
TMEM130	IL-4	3.05632	2.4787	30.5487	0.000581872	0.120926
SLAMF1	IL-4	2.91318	2.03615	23.2526	0.00136777	0.181257
LHFPL6	IL-4	2.88559	2.50318	24.3824	0.00119598	0.181257
FST	IL-4	2.8278	0.466651	32.3196	0.000475151	0.107437
PLCB1	IL-4	2.82102	2.13281	40.5576	0.000223351	0.0701809
CD1C	IL-4	2.74666	3.54238	45.821	0.000151153	0.059535
CREG2	IL-4	2.72475	1.31283	22.1032	0.0015704	0.18482
EFNA1	IL-4	2.67932	0.936363	53.9606	8.34164e-05	0.043502
FAR2	IL-4	2.65852	3.4916	37.4985	0.000301402	0.0812291
EMB	IL-4	2.64938	3.82953	27.4016	0.000918408	0.164908
OLFML3	IL-4	2.62674	0.771261	12.0383	0.00855026	0.419272
MRC1	IL-4	2.5146	8.0838	118.724	4.72475e-06	0.00953517
SOCS1	IL-4	2.47502	2.81046	13.8178	0.00657778	0.378843
DNASE1L3	IL-4	2.44691	2.62877	19.4806	0.00233961	0.214787
ALDH1A2	IL-4	2.44327	5.32538	38.8704	0.000300113	0.0812291
HOMER2	IL-4	2.40026	2.84075	88.068	1.43167e-05	0.0167558
PLXNA2	IL-4	2.38671	4.31174	76.4233	2.40388e-05	0.022578
CCL28	IL-4	2.34441	-0.166103	10.5842	0.0117628	0.48559
CHI3L2	IL-4	2.33471	2.73038	38.021	0.000277614	0.0788294
MAP2K6	IL-4	2.33367	1.18739	13.0182	0.00699182	0.391606
SIGLEC10	IL-4	2.31391	4.82034	17.0903	0.00391624	0.279633
FCGR2B	IL-4	2.28287	5.62035	21.0099	0.00221622	0.212908
FGL2	IL-4	2.05945	5.37136	86.8071	1.50953e-05	0.0167558
SH3BGRL2	IL-4	1.98576	0.225868	12.1377	0.00837009	0.415215
BCL2L11	IL-4	1.9419	3.17881	24.1789	0.00119607	0.181257
THBD	IL-4	1.92821	1.53463	10.4126	0.0122411	0.493279
NFATC2	IL-4	1.90067	3.3791	21.2205	0.00180151	0.194658
AQP3	IL-4	1.88526	2.0698	16.188	0.00388274	0.279633
CHCHD7	IL-4	1.81167	6.16105	51.9448	9.54437e-05	0.043502
MCOLN2	IL-4	1.80004	2.36719	24.771	0.00110803	0.181257
CRHR2	IL-4	1.78118	0.445054	13.3278	0.00657204	0.378843
FOXC1	IL-4	1.77914	2.28851	15.8209	0.00413818	0.292064
TMEM273	IL-4	1.77742	4.51803	12.7656	0.00831326	0.415215
CYSLTR1	IL-4	1.74103	2.38052	12.6366	0.00755618	0.39817
TLE1	IL-4	1.71601	4.32992	23.582	0.00131037	0.181257
XKR3	IL-4	1.70421	0.03247	10.7024	0.0114496	0.48207
PTGER2	IL-4	1.70208	2.5743	10.3436	0.0125822	0.502572
ARHGAP26	IL-4	1.69465	4.91313	24.0728	0.00125201	0.181257
SUSD4	IL-4	1.67287	0.0166322	13.3824	0.00650173	0.378029
CTSC	IL-4	1.66002	6.91354	61.7055	5.19083e-05	0.0333579
TGM2	IL-4	1.62841	10.6259	99.5681	9.10211e-06	0.0123485
QSOX1	IL-4	1.60458	7.32883	52.6921	9.0672e-05	0.043502
NR4A3	IL-4	1.5756	4.71792	16.6014	0.00389817	0.279633
PKD2	IL-4	1.57134	5.30293	117.445	4.92034e-06	0.00953517
RGS16	IL-4	1.57029	3.30615	22.1738	0.00155534	0.18482
BATF3	IL-4	1.53846	2.06526	16.1717	0.00389366	0.279633
TNFRSF11A	IL-4	1.49848	4.56148	66.7188	3.92579e-05	0.0299587
NIPAL1	IL-4	1.43869	3.25167	43.3962	0.000177459	0.0677119
ERI1	IL-4	1.41421	4.98608	33.4078	0.000426351	0.104115
NUDT16P1	IL-4	1.38955	2.57628	23.1609	0.00136254	0.181257
GALNT18	IL-4	1.38602	2.27005	17.6984	0.0030187	0.253105
TRAF5	IL-4	1.38132	3.01377	12.7005	0.00745467	0.39817
ZNF704	IL-4	1.35028	0.513604	10.2019	0.0128519	0.509488
LIMA1	IL-4	1.33963	6.24346	11.6377	0.0102669	0.462398
CLEC4A	IL-4	1.33876	3.91604	22.2	0.00154979	0.18482
ANPEP	IL-4	1.32828	7.32245	11.2448	0.0110906	0.475145
CCL22	IL-4	1.30976	11.5563	19.4487	0.00229791	0.212908
TRAF1	IL-4	1.29066	5.4318	63.3951	4.71403e-05	0.0319844
DHRS11	IL-4	1.28743	6.21608	48.4958	0.00012107	0.0509747
PXYLP1	IL-4	1.28576	2.24557	15.3481	0.00449903	0.30585
METTL7B	IL-4	1.27774	3.76395	19.7665	0.00219117	0.212908
FKBP5	IL-4	1.27642	4.69414	17.4529	0.0031807	0.257082
DCUN1D3	IL-4	1.24996	3.96762	36.0574	0.000331356	0.0832294
C17orf58	IL-4	1.23908	5.65851	19.213	0.0024138	0.218314
BCL7A	IL-4	1.22054	4.21003	32.0595	0.000487836	0.1083
WFS1	IL-4	1.21711	5.26273	51.8086	9.61962e-05	0.043502
CYP27B1	IL-4	1.20413	6.11932	52.1358	9.41024e-05	0.043502
FGD2	IL-4	1.19153	4.82842	36.039	0.000331918	0.0832294
TJP2	IL-4	1.18578	2.75117	10.5808	0.0117719	0.48559
PALLD	IL-4	1.17935	7.95446	10.5518	0.0124617	0.500518
SLC26A6	IL-4	1.16976	3.43568	17.3716	0.00318334	0.257082
SCARF1	IL-4	1.16466	3.24115	13.0809	0.00690176	0.390125
PAM	IL-4	1.15347	5.97091	19.7187	0.0022253	0.212908
PTGS1	IL-4	1.15212	6.01142	16.7352	0.00358032	0.26985
PFKP	IL-4	1.14986	5.7183	41.1955	0.000211851	0.0700989
PCSK5	IL-4	1.14963	3.65361	14.6003	0.00515452	0.331246
SLC7A8	IL-4	1.13841	9.02464	41.1629	0.000212421	0.0700989
PPP1R3B	IL-4	1.13204	2.57612	14.2583	0.00549423	0.342799
HLA-DQA1	IL-4	1.13152	5.2145	24.052	0.00121358	0.181257
EPB41L2	IL-4	1.08164	8.12956	32.6873	0.000457917	0.107437
ABCG2	IL-4	1.08082	4.77185	20.6062	0.00193763	0.202209
BIN2	IL-4	1.07382	7.59462	11.6197	0.00951606	0.438457
CHMP4C	IL-4	1.02961	2.73659	21.6476	0.00167214	0.192612
SLA	IL-4	1.02814	6.34455	17.6438	0.00304721	0.253105
FCHO1	IL-4	1.01562	3.70296	10.5554	0.0118406	0.486779
CD86	IL-4	1.0114	7.04294	16.7515	0.00352995	0.269379
AMPD2	IL-4	0.991789	5.86503	23.2318	0.00134988	0.181257
SORT1	IL-4	0.984172	7.54936	25.7794	0.000978634	0.170702
SPRED2	IL-4	0.982348	4.27782	23.3124	0.00133566	0.181257
NDFIP2	IL-4	0.9765	3.89075	14.6884	0.00507135	0.328632
GGTA1P	IL-4	0.962256	5.77407	21.1986	0.0017806	0.194118
PIK3R6	IL-4	0.960878	3.47188	15.2742	0.00455894	0.30585
ATXN1	IL-4	0.959412	5.66713	11.1837	0.0103624	0.462398
JADE1	IL-4	0.958788	4.38399	17.339	0.00320037	0.257082
SNAI3	IL-4	0.947272	4.90169	23.1479	0.00136487	0.181257
AQP9	IL-4	0.943368	7.94737	29.9439	0.000608549	0.12181
IL1RN	IL-4	0.938695	10.0591	16.32	0.00379574	0.279193
IL4I1	IL-4	0.93807	6.11456	21.0129	0.00182806	0.195794
CASP7	IL-4	0.924668	4.19319	17.078	0.003341	0.261208
PODXL	IL-4	0.910644	4.25193	15.3336	0.00451071	0.30585
PPFIBP1	IL-4	0.904052	5.01496	19.4932	0.00228256	0.212908
LRRC8C	IL-4	0.901584	3.28255	22.688	0.00145092	0.184539
JAG1	IL-4	0.896515	3.87113	14.4968	0.00525443	0.334578
EEA1	IL-4	0.885105	6.85119	23.5126	0.00130115	0.181257
VSIG10L	IL-4	0.884463	2.65745	12.8652	0.00720691	0.39817
CCNH	IL-4	0.882502	5.01119	12.001	0.00861434	0.420725
ADD3	IL-4	0.877695	5.76787	10.7469	0.0114235	0.48207
GPSM1	IL-4	0.872946	2.03253	10.6505	0.011586	0.48447
ETV3	IL-4	0.862707	2.75657	13.6442	0.00617795	0.370498
MAN1A1	IL-4	0.855849	6.45596	22.0854	0.00157423	0.18482
SHPK	IL-4	0.8457	2.97033	12.7823	0.00732866	0.39817
MDH1	IL-4	0.836761	9.06642	24.4594	0.0011523	0.181257
MYCL	IL-4	0.832779	4.28649	14.4899	0.00526117	0.334578
RAP1A	IL-4	0.832527	8.17589	17.2058	0.00327118	0.260282
CTNS	IL-4	0.827019	6.0293	24.3767	0.00116443	0.181257
TGFBI	IL-4	0.82199	6.11111	25.816	0.000974301	0.170702
ZNF124	IL-4	0.814141	2.80866	10.2883	0.0125952	0.502572
EPS8	IL-4	0.813224	6.21962	12.4466	0.00784928	0.4061
ANXA11	IL-4	0.812878	10.0343	22.4341	0.00150134	0.18482
SLC50A1	IL-4	0.807855	5.58779	17.0826	0.00333843	0.261208
SMAD7	IL-4	0.805146	2.47658	10.1361	0.0130521	0.515408
OGFRL1	IL-4	0.769631	6.09104	15.9563	0.00404159	0.286906
AGPAT4	IL-4	0.763337	5.67725	28.2128	0.000736319	0.142706
CYTOR	IL-4	0.748901	7.00647	12.9503	0.00708453	0.394987
ADPGK	IL-4	0.731735	6.8125	22.241	0.00154116	0.18482
CKLF	IL-4	0.72386	7.0124	24.3124	0.00117396	0.181257
APEX1	IL-4	0.717581	6.30219	13.823	0.00596831	0.361062
CD300LB	IL-4	0.716044	7.59402	10.911	0.0109224	0.474015
SEPT7	IL-4	0.701975	7.37848	20.131	0.00207629	0.212908
PPARG	IL-4	0.69855	6.0218	19.7726	0.00218919	0.212908
AP1B1	IL-4	0.689722	8.49685	23.3328	0.00133209	0.181257
ST6GAL1	IL-4	0.689231	7.21656	10.8011	0.0111962	0.475623
CD40	IL-4	0.685108	6.58693	21.3674	0.00173883	0.194118
PARP8	IL-4	0.677503	4.23549	19.9382	0.00213609	0.212908
HSPH1	IL-4	0.677246	7.25138	15.6058	0.00429764	0.298149
PIK3R1	IL-4	0.673378	5.70228	13.0929	0.00688519	0.390125
CLNS1A	IL-4	0.66921	5.54093	10.885	0.0109866	0.474015
MAN2A1	IL-4	0.650714	6.26955	11.1193	0.0104262	0.462923
FAM129B	IL-4	0.641405	8.56858	10.803	0.0111915	0.475623
EPS15	IL-4	0.636719	5.93777	18.1808	0.00279469	0.242128
EPN2	IL-4	0.63415	4.5764	11.778	0.00903251	0.427469
ANXA4	IL-4	0.626665	6.82225	21.4184	0.00172645	0.194118
ADAM15	IL-4	0.623276	6.59801	18.133	0.00281591	0.242128
PKNOX1	IL-4	0.622718	3.38707	10.8687	0.0110269	0.474077
UGP2	IL-4	0.608716	6.74522	17.6702	0.00303246	0.253105
ITGAM	IL-4	0.607057	8.67649	17.4483	0.0031437	0.257082
NEK6	IL-4	0.600452	7.97237	16.4983	0.00368213	0.274139
CITED2	IL-4	0.584545	6.73581	14.7254	0.00503689	0.328632
TAX1BP3	IL-4	0.580179	6.85098	16.6183	0.00360806	0.270273
