# Supplementary material for: Efferocytosis potentiates the expression of arachidonate 15-lipoxygenase (ALOX15) in alternatively activated human macrophages through LXR activation
Source: Cell Death Differ. 2020 Nov 11;28(4):1301–16. doi: 10.1038/s41418-020-00652-4 (PMC8027700; doi:10.1038/s41418-020-00652-4)
Supplement: Supplementary file 8 — Supplementary Table 4 [file 41418_2020_652_MOESM8_ESM.xlsx]

## Sheet: M2 genes
Gene	Treatment	logFC	logCPM	F	PValue	FDR	mean CPM Tx	mean CPM unTx
MRC1	IL-13	1.73025	7.44658	21.844	0.00155493	1	268.02	80.8557
	IL-4	2.51317	8.07985	140.247	1.82598e-13	3.65846e-09	460.442	80.7444
	T09	-1.00442	5.91937	3.53958	0.127013	1	40.2804	80.7327
	T09 + IL-13	1.12649	6.98937	11.648	0.00746736	1	174.279	79.8716
	T09 + IL-4	2.22813	7.83537	87.9938	8.41116e-10	3.92487e-06	376.406	80.4283
TGM2	IL-13	1.09593	10.2445	17.9389	0.000202774	1	1652.89	773.346
	IL-4	1.62578	10.6229	60.5868	5.48935e-09	2.74957e-05	2381.9	771.896
	T09	0.207767	9.69899	1.1053	0.299237	1	890.911	771.429
	T09 + IL-13	1.08244	10.2179	20.6128	4.97711e-05	0.0383538	1617.87	764.054
	T09 + IL-4	1.45239	10.4864	42.7511	4.07721e-07	0.000583498	2101.27	767.91
CD209	IL-13	2.10482	3.58996	9.74575	0.0255344	1	19.473	4.6079
	IL-4	3.35599	4.66436	142.769	2.6215e-10	1.96963e-06	46.1682	4.60465
	T09	-0.313612	2.06127	0.270921	0.615487	1	3.72582	4.60527
	T09 + IL-13	2.19021	3.63876	14.8996	0.00749263	1	20.4164	4.55174
	T09 + IL-4	3.62765	4.90874	131.545	8.39683e-09	2.77206e-05	55.548	4.59661
CISH	IL-13	2.83714	3.84762	37.171	0.000256314	1	25.168	3.62052
	IL-4	3.33007	4.28153	166.019	1.80557e-14	5.42636e-10	35.3421	3.62007
	T09	-0.133631	1.79027	0.117748	0.733235	1	3.3058	3.61404
	T09 + IL-13	2.95963	3.9365	70.5391	1.75088e-07	0.000420959	27.1201	3.58324
	T09 + IL-4	3.41636	4.35119	166.759	2.09274e-13	6.28941e-09	37.2989	3.60098
FGL2	IL-13	1.37144	4.84679	36.1369	1.41083e-06	0.0424003	41.4644	16.092
	IL-4	2.05754	5.36643	97.2548	2.14577e-11	3.22439e-07	66.4898	16.0575
	T09	-0.522688	3.76952	2.80383	0.112669	1	11.1938	16.0576
	T09 + IL-13	1.02844	4.58986	19.3984	7.60539e-05	0.0544211	32.2931	15.8869
	T09 + IL-4	2.15102	5.43665	74.3293	1.53759e-08	4.23624e-05	70.6766	16.0022
ALDH1A2	IL-13	1.10071	4.2992	16.9404	0.0003495	1	26.8078	12.5661
	IL-4	2.44093	5.32308	29.2145	0.00217054	0.570716	67.5891	12.5423
	T09	-0.612908	3.37645	5.17752	0.0281521	1	8.2298	12.5307
	T09 + IL-13	0.325836	3.80457	1.38199	0.246645	1	15.5513	12.418
	T09 + IL-4	1.54817	4.60527	16.1315	0.00334361	0.493614	36.2665	12.475
SPINT2	IL-13	2.74531	4.99797	9.10808	0.0363431	1	55.531	8.3699
	IL-4	3.70569	5.85945	141.988	1.83277e-07	0.000393437	107.823	8.35854
	T09	0.624008	3.40536	4.11178	0.053335	1	12.8318	8.36221
	T09 + IL-13	2.70902	4.94702	16.3719	0.0127332	1	53.5106	8.26321
	T09 + IL-4	3.65712	5.81047	125.137	1.85782e-07	0.000293863	103.968	8.34285
TSPAN7	IL-13	3.35367	2.82802	9.7751	0.0310561	1	12.8369	1.3626
	IL-4	4.60813	3.98331	21.2037	0.00862282	1	30.3554	1.3626
	T09	0.208832	0.538917	0.0878169	0.770783	1	1.54256	1.35864
	T09 + IL-13	2.91299	2.41599	15.4016	0.00595983	1	9.40559	1.34982
	T09 + IL-4	4.50166	3.87298	25.9678	0.00508292	0.652819	28.0501	1.35576
CHCHD7	IL-13	0.866941	5.4882	17.3674	0.000244693	1	57.9484	31.8249
	IL-4	1.80767	6.15687	70.1666	1.89016e-08	7.57412e-05	110.967	31.7787
	T09	0.0625633	5.02047	0.100689	0.752607	1	33.1514	31.7581
	T09 + IL-13	1.07735	5.60993	26.0165	8.39364e-06	0.00934289	66.2555	31.4504
	T09 + IL-4	1.84735	6.18043	67.9411	6.13466e-09	2.3046e-05	113.482	31.6215
SCIMP	IL-13	2.67097	5.2429	11.5555	0.0246262	1	65.3844	10.3479
	IL-4	3.55514	6.03048	33.6185	0.00337785	0.786947	120.458	10.3349
	T09	0.0673671	3.4057	0.00953492	0.926316	1	10.8509	10.345
	T09 + IL-13	2.99213	5.50401	16.8435	0.0128854	1	80.6228	10.2117
	T09 + IL-4	3.87494	6.32486	40.2099	0.00186977	0.343689	150.081	10.3267
CH25H	IL-13	2.70222	0.0965268	9.29311	0.00749238	1	1.77904	0.364695
	IL-4	4.29985	1.46183	24.9837	0.00080144	0.278452	5.16296	0.368993
	T09	-0.613635	-1.60638	0.239782	0.626962	1	0.275605	0.367252
	T09 + IL-13	0.987881	-1.04026	0.881838	0.35328	1	0.614333	0.363735
	T09 + IL-4	3.40645	0.66072	22.9336	7.23827e-05	0.0300049	2.82817	0.371602
CTSC	IL-13	0.894415	6.37394	17.2318	0.000255939	1	107.817	58.0554
	IL-4	1.65805	6.91078	69.5557	1.17958e-09	7.87789e-06	182.722	57.9717
	T09	-0.0735251	5.82022	0.156697	0.694259	1	55.0572	57.9387
	T09 + IL-13	0.953688	6.39544	22.233	2.86787e-05	0.0253499	111.018	57.3688
	T09 + IL-4	1.59466	6.85578	48.8246	2.4783e-07	0.000381957	173.998	57.6899
MAOA	IL-13	2.70278	3.70196	11.2745	0.0237519	1	22.4677	3.54993
	IL-4	3.74089	4.62686	214.268	4.84387e-16	2.9115e-11	45.9434	3.54578
	T09	0.153009	1.89798	0.150461	0.700093	1	3.93762	3.54121
	T09 + IL-13	2.82012	3.78339	16.1186	0.0107641	1	24.1269	3.5102
	T09 + IL-4	3.9136	4.77982	183.128	2.09913e-12	3.15431e-08	51.5088	3.52926
PARM1	IL-13	2.83796	1.84794	26.5744	8.55382e-05	0.64268	6.24481	0.967239
	IL-4	3.63372	2.54285	24.8514	0.00198756	0.535723	10.7259	0.968677
	T09	0.0514363	-0.0188031	0.00378543	0.951713	1	0.992597	0.967479
	T09 + IL-13	2.85512	1.84163	16.8634	0.0020801	0.545976	6.22191	0.957308
	T09 + IL-4	3.81172	2.70139	31.6045	0.000579215	0.146281	12.0898	0.969774
SOCS1	IL-13	1.83202	2.29369	3.14479	0.141906	1	7.59008	2.20642
	IL-4	2.47678	2.80575	9.91326	0.0253449	1	11.8128	2.20869
	T09	-0.202225	1.05577	0.092355	0.766161	1	1.94531	2.20956
	T09 + IL-13	2.05392	2.4416	4.07482	0.105663	1	8.75426	2.18073
	T09 + IL-4	2.38393	2.72593	9.87818	0.0211317	1	11.0714	2.2106
CCL13	IL-13	4.83504	1.32688	5.745	0.0704869	1	4.72532	0.271882
	IL-4	5.12658	1.581	10.4217	0.0278662	1	5.79754	0.277138
	T09	-4.41974	-2.31837	4.14428	0.0485771	1	0.120797	0.274536
	T09 + IL-13	3.38286	-0.00391679	8.21348	0.0161385	1	1.80408	0.273278
	T09 + IL-4	4.10957	0.636283	25.5184	8.05795e-05	0.0322893	2.91511	0.278356
CCL17	IL-13	3.47362	1.01984	3.97151	0.110998	1	3.62374	0.426615
	IL-4	3.48126	1.01425	22.4404	0.000290051	0.13627	3.63884	0.430146
	T09	0.233166	-1.13644	0.0505629	0.823199	1	0.48611	0.428335
	T09 + IL-13	0.645897	-0.96236	0.349586	0.559263	1	0.598872	0.424596
	T09 + IL-4	2.91029	0.529715	11.6	0.00459739	0.61862	2.4791	0.43219
CCL18	IL-13	3.30649	1.86643	4.3856	0.0999382	1	6.51273	0.759581
	IL-4	3.53758	2.0583	10.7517	0.0235398	1	7.65093	0.763984
	T09	-1.35271	-0.814882	2.38433	0.130208	1	0.363568	0.760787
	T09 + IL-13	2.42042	1.0816	5.73598	0.0488422	1	3.57291	0.755419
	T09 + IL-4	2.94703	1.52751	6.0014	0.0579333	1	5.10171	0.762023
CCL22	IL-13	1.05325	11.3781	7.13101	0.0239905	1	3592.2	1731.07
	IL-4	1.31153	11.5528	27.8828	1.46364e-05	0.0149111	4283.07	1725.68
	T09	-0.688431	10.4501	3.81664	0.0852135	1	1071.34	1726.44
	T09 + IL-13	-0.0213081	10.7271	0.00686706	0.934435	1	1682.49	1707.51
	T09 + IL-4	0.371363	10.946	2.1902	0.149906	1	2225.27	1720.27
