# Supplementary material for: Efferocytosis potentiates the expression of arachidonate 15-lipoxygenase (ALOX15) in alternatively activated human macrophages through LXR activation
Source: Cell Death Differ. 2020 Nov 11;28(4):1301–16. doi: 10.1038/s41418-020-00652-4 (PMC8027700; doi:10.1038/s41418-020-00652-4)
Supplement: Supplementary file 9 — Supplementary Table 5 [file 41418_2020_652_MOESM9_ESM.xlsx]

## Sheet: Fig 3E
Gene	Treatment	logFC	logCPM	F	PValue	FDR	mean CPM Tx	mean CPM unTx
ALOX15	IL-13	5.38849	2.13412	34.21	0.000643367	1	8.47996	0.307778
	IL-4	6.79575	3.49923	52.3227	0.000889343	0.29385	22.3474	0.312098
	T09	-1.44657	-1.99463	0.818274	0.370947	1	0.187773	0.310294
	T09 + IL-13	6.39546	3.08847	27.6486	0.00471239	0.904945	16.767	0.307544
	T09 + IL-4	7.51061	4.20117	87.1051	0.000131187	0.0472172	36.5394	0.31476
IL1RN	IL-13	0.604371	9.84878	3.62	0.0788341	1	1112.44	731.76
	IL-4	0.937566	10.0569	18.4599	0.000142574	0.0816162	1399.61	730.799
	T09	0.0298613	9.52763	0.0204098	0.887095	1	745.73	730.432
	T09 + IL-13	1.45304	10.4002	21.0444	0.000384564	0.181108	1979.63	723.118
	T09 + IL-4	1.89542	10.7451	56.9395	2.94345e-08	6.31865e-05	2705.51	727.305
CIITA	IL-13	0.748906	1.84713	2.04523	0.173094	1	4.48369	2.708
	IL-4	1.3711	2.25146	5.9151	0.0363418	1	6.83006	2.7065
	T09	-0.193442	1.35311	0.0993584	0.757718	1	2.38314	2.70904
	T09 + IL-13	1.65524	2.43891	8.8777	0.0131109	1	8.20588	2.67303
	T09 + IL-4	2.57265	3.18767	16.8942	0.00522269	0.66368	15.5743	2.70953
XXYLT1	IL-13	0.543944	2.67366	2.4125	0.130973	1	7.54417	5.21217
	IL-4	0.925706	2.90554	7.64932	0.0100955	1	9.80736	5.21217
	T09	0.570849	2.68569	2.32408	0.141483	1	7.69987	5.20537
	T09 + IL-13	1.66975	3.41166	14.7172	0.00271607	0.632018	16.1932	5.15744
	T09 + IL-4	1.75225	3.48099	33.0839	3.40474e-06	0.00269275	17.2045	5.18618
LILRB1	IL-13	0.42131	5.344	1.44615	0.26153	1	46.4967	34.7445
	IL-4	0.782619	5.55599	1.80756	0.244835	1	59.4761	34.6285
	T09	0.515267	5.39338	2.0888	0.191727	1	49.4198	34.6336
	T09 + IL-13	1.48909	6.0252	31.927	3.3655e-05	0.0288986	95.9971	34.2761
	T09 + IL-4	1.92323	6.36603	29.9249	0.000570594	0.144712	130.516	34.5015
